# Supplementary material for: Genetic differentiation in life history traits and thermal stress performance across a heterogeneous dune landscape in Arabidopsis lyrata
Source: Oxford University Press journal article supplement (doi:10.1093/aob/mcy090), 2018-04-30
Supplement: mcy090_suppl_supplementary_aob-18158-s01.doc [file mcy090_suppl_supplementary_aob-18158-s01.doc]

**Table S1.** Spatial autocorrelation analysis. The table shows Moran’s index (Moran’s I) and associated *P*-values for each of the environmental variables and traits (*N* = 40).

| Environmental variables | Moran’s I | *P-value* |
| --- | --- | --- |
| Distance from trees | 0.108 | 0.270 |
| Dune position | 0.037 | 0.369 |
| Vegetation cover | 0.237 | 0.131 |
| Intraspecific density | 0.009 | 0.412 |
| Trait variables | Moran’s I | P-value |
| Size control | 0.081 | 0.306 |
| Size frost | -0.202 | 0.727 |
| Size heat | 0.011 | 0.409 |
| Flowering time control | 0.272 | 0.104 |
| Frost resistance frost | 0.224 | 0.142 |
| Heat resistance heat | 0.091 | 0.293 |
