# Supplementary material for: Genetic differentiation in life history traits and thermal stress performance across a heterogeneous dune landscape in Arabidopsis lyrata
Source: Oxford University Press journal article supplement (doi:10.1093/aob/mcy090), 2018-04-30
Supplement: mcy090_suppl_supplementary_aob-18158-s02.doc [file mcy090_suppl_supplementary_aob-18158-s02.doc]

**Table S2.** Pearson correlation coefficients of environmental and trait data. The environmental variables were: distance from the crown edge (distance from trees), the fraction down on dunes (dune position), percent of ground covered by grass and herbs (vegetation cover) and density of *Arabidopsis lyrata* plants (intraspecific density). The trait variables were: rosette size of plants under control conditions (size control), under regular frost stress (size frost) and under regular heat stress (size heat), flowering time of control plants, frost resistance of frost-acclimated plants (frost resistance frost) and heat resistance of heat-acclimated plants (heat resistance heat). *N* = 40. Significance is indicated in bold: **P* < 0.05, ***P* < 0.01.

| Environmental variables | Distance from trees | Dune position | Vegetation cover |  |  |
| --- | --- | --- | --- | --- | --- |
| Distance from trees | 1 |  |  |  |  |
| Dune position | -0.26 | 1 |  |  |  |
| Vegetation cover | 0.26 | -0.17 | 1 |  |  |
| Intraspecific density | -0.19 | 0.06 | 0.11 |  |  |
|  | | | | | |
| Trait variables | Size control | Size frost | Size heat | Flowering time control | Frost resistance frost |
| Size control | 1 |  |  |  |  |
| Size frost | -0.18 | 1 |  |  |  |
| Size heat | **0.34*** | 0.18 | 1 |  |  |
| Flowering time control | **0.44**** | -0.15 | -0.01 | 1 |  |
| Frost resistance frost | -0.19 | -0.16 | -0.27 | 0.19 | 1 |
| Heat resistance heat | -0.09 | -0.17 | -0.17 | -0.08 | -0.13 |
